# Supplementary material
Source: PubMed Central journal article supplement (PMC3415243)
Supplement: NIHMS325554-supplement-1.pdf [file NIHMS325554-supplement-1.pdf]

## Supplement Material

### Expanded Materials and Methods

#### *Isolation and stimulation of mouse peritoneal macrophages*

Macrophages were collected from the peritoneum of the *apo E*<sup>-/-</sup>*x gclm*<sup>-/-</sup>, *apo E*<sup>-/-</sup>/*Gclc-Tg*, and *apo E*<sup>-/-</sup> mice four days after i.p. injection of 2 ml of 4% thioglycollate. Peritoneal exudate cells were harvested from the peritoneal cavity four times with 5 ml each of RPMI-1640-5% FBS. The cells were washed twice with 30 ml of ice-cold PBS after centrifugation at 250 x g at 4°C. Total cell numbers were determined with a hemocytometer after staining with Turk solution (Wako Pure Chemical Industries). Cells ( $3.2 \times 10^6$  cells/cm<sup>2</sup>) were cultured in RPMI 1640 medium supplemented with 10% FBS (RPMI 1640–10% FBS) at 37°C in 5% CO<sub>2</sub>. After incubation for 2 h, the medium was changed and cultured in RPMI 1640–10% FBS for an additional 20–22 h.

#### *Measurement of cellular and tissue GSH content*

The total glutathione content (GSH+GSSG) in mouse peritoneal macrophages, liver, spleen and lung from 3 mice/group was determined in a 96-well fluorescent microtiter plate assay<sup>1,2</sup>. Briefly, the cells or tissue aliquots were homogenized in TES/SB buffer (20 mM Tris, 1 mM EDTA, 250 mM sucrose, 20 mM sodium borate, 2 mM L-serine, PH 7.4) and an equal volume of 10% of sulfosalicylic acid was added to the homogenates, and precipitated protein was removed by centrifuging at 4 °C at 12,000 rpm for 5 min. 25 µl of the resulting

supernatant was added to 100  $\mu$ l of 0.2 M NEM (n-ethylmorpholine) in 0.02 M KOH and 10  $\mu$ l of tris carboxyethylphosphine (TCEP) were pipetted to 96-well flat-bottom fluorescent microtiter plate and incubated for 15 min at room temperature. To bring the solution to a pH of 12.5, 50  $\mu$ l of NaOH were added, followed by 10  $\mu$ l of 10 mM naphthaline dicarboxyaldehyde. After 30 min incubation in the dark at room temperature, the fluorescence was detected using 472 nm excitation and 528 nm emission (Molecular Devices, Spectra Max M2). All assays were performed in triplicate. Standard curves were run simultaneously with 0–25 nmol of GSSG per well and the GSH levels were calculated as nmole per microgram of soluble protein (nmole/mg) in the original cell extract.

1. Ou YC, White CC, Krejsa CM, Ponce RA, Kavanagh TJ, Faustman EM. The roles of intracellular glutathione in methylmercury-induced toxicity in embryonic neuronal cells. *Neurotoxicology*. 1999;20:793-804.

2. White CC, Viernes H, Krejsa CM, Botta D, Kavanagh TJ. Fluorescence-based microtiter plate assay for glutamate-cysteine ligase activity. *Anal Biochem*. 2003;318:175-80.

A

|                     | Male                                                             |                                      |                                                                  |                                      |                                                                  |                                      |                                                                  |                                     |
|---------------------|------------------------------------------------------------------|--------------------------------------|------------------------------------------------------------------|--------------------------------------|------------------------------------------------------------------|--------------------------------------|------------------------------------------------------------------|-------------------------------------|
|                     | 20 weeks of age                                                  |                                      | 30 weeks of age                                                  |                                      | 40 weeks of age                                                  |                                      | 50 weeks of age                                                  |                                     |
|                     | <i>ApoE</i> <sup>-/-</sup> / <i>Gclm</i> <sup>-/-</sup><br>(n=5) | <i>ApoE</i> <sup>-/-</sup><br>(n=14) | <i>ApoE</i> <sup>-/-</sup> / <i>Gclm</i> <sup>-/-</sup><br>(n=8) | <i>ApoE</i> <sup>-/-</sup><br>(n=14) | <i>ApoE</i> <sup>-/-</sup> / <i>Gclm</i> <sup>-/-</sup><br>(n=7) | <i>ApoE</i> <sup>-/-</sup><br>(n=10) | <i>ApoE</i> <sup>-/-</sup> / <i>Gclm</i> <sup>-/-</sup><br>(n=9) | <i>ApoE</i> <sup>-/-</sup><br>(n=3) |
| Foam cells          | 57.5% ± 19.2%                                                    | 62.5% ± 11.2%                        | 92.5% ± 7.5% *                                                   | 65% ± 11.5%                          | 81.2% ± 11.6%                                                    | 68.3% ± 12.7%                        | 43% ± 15.9%                                                      | 81.9% ± 7.2%                        |
| Thin fibrous cap    | 3.3% ± 3.3%                                                      | 0%                                   | 33.1% ± 9.9%*                                                    | 0%                                   | 7.1% ± 7.1%                                                      | 10% ± 10%                            | 29.7% ± 13.1%                                                    | 42.9% ± 0%                          |
| Large necrotic core | 0%                                                               | 0%                                   | 14.7% ± 10.4%*                                                   | 0%                                   | 50.4% ± 13.7%                                                    | 18.3% ± 10.7%                        | 52.4% ± 13.3%                                                    | 21.5% ± 21.5%                       |
| Cholesterol clefts  | 0%                                                               | 0%                                   | 27.0% ± 11.4% *                                                  | 1% ± 1%                              | 67.7% ± 13.8%                                                    | 32.7% ± 11.7%                        | 82.6% ± 11.3%                                                    | 35.7% ± 35.7%                       |
| Lateral xanthomas   | 3.3% ± 3.3%                                                      | 0%                                   | 46.9% ± 16%*                                                     | 1% ± 1%                              | 47.7% ± 11.3%                                                    | 23% ± 12.3%                          | 47.6% ± 12.1%                                                    | 14.3% ± 14.3%                       |
| Hemorrhage          | 0%                                                               | 0%                                   | 30.5% ± 13.8%*                                                   | 0%                                   | 14.3% ± 12.1%                                                    | 14% ± 10.3%                          | 5.6% ± 3.9%                                                      | 0,0%                                |
| Medial thickening   | 50.8% ± 20.9%                                                    | 80% ± 10.3%                          | 100% *                                                           | 76.8% ± 10.6%                        | 100%                                                             | 100%                                 | 100%                                                             | 100,0%                              |
| Chondrocytes        | 0%                                                               | 0%                                   | 19.5% ± 8.1%*                                                    | 0%                                   | 67.9% ± 12.1%*                                                   | 13.5% ± 7.4%                         | 57.8% ± 16.8%                                                    | 35.7% ± 35.7%                       |
| Calcification       | 0%                                                               | 0%                                   | 0%                                                               | 0%                                   | 4.1% ± 4.1%                                                      | 0%                                   | 0%                                                               | 7.2% ± 7.2%                         |

B

|                     | Female                                                           |                                      |                                                                  |                                      |                                                                  |                                      |                                                                  |                                      |
|---------------------|------------------------------------------------------------------|--------------------------------------|------------------------------------------------------------------|--------------------------------------|------------------------------------------------------------------|--------------------------------------|------------------------------------------------------------------|--------------------------------------|
|                     | 20 weeks of age                                                  |                                      | 30 weeks of age                                                  |                                      | 40 weeks of age                                                  |                                      | 50 weeks of age                                                  |                                      |
|                     | <i>ApoE</i> <sup>-/-</sup> / <i>Gclm</i> <sup>-/-</sup><br>(n=5) | <i>ApoE</i> <sup>-/-</sup><br>(n=21) | <i>ApoE</i> <sup>-/-</sup> / <i>Gclm</i> <sup>-/-</sup><br>(n=8) | <i>ApoE</i> <sup>-/-</sup><br>(n=14) | <i>ApoE</i> <sup>-/-</sup> / <i>Gclm</i> <sup>-/-</sup><br>(n=6) | <i>ApoE</i> <sup>-/-</sup><br>(n=11) | <i>ApoE</i> <sup>-/-</sup> / <i>Gclm</i> <sup>-/-</sup><br>(n=5) | <i>ApoE</i> <sup>-/-</sup><br>(n=14) |
| Foam cells          | 97.5% ± 10.9% *                                                  | 48.9% ± 7.3%                         | 76% ± 12.5%                                                      | 85.4% ± 6.1%                         | 48% ± 19.6%                                                      | 53% ± 12.3%                          | 13% ± 8.6%*                                                      | 47.2% ± 8.9%                         |
| Thin fibrous cap    | 7.5% ± 0.6% *                                                    | 1.7% ± 1.2%                          | 28.3% ± 9.8%                                                     | 29.2% ± 9.7%                         | 4.8% ± 4.8%                                                      | 18.2% ± 10.9%                        | 46.1% ± 18.2%                                                    | 33.2% ± 9.6%                         |
| Large necrotic core | 7.5% ± 1.2% *                                                    | 0%                                   | 36.7% ± 12.3% *                                                  | 3.8% ± 2.6%                          | 62.7% ± 14.2% *                                                  | 27.3% ± 7.3%                         | 73.4% ± 16.2%                                                    | 44.7% ± 9.2%                         |
| Cholesterol clefts  | 10% ± 1.6% *                                                     | 0%                                   | 57.3% ± 14.8% *                                                  | 14.8% ± 5.3%                         | 100% *                                                           | 47% ± 11.2%                          | 100%*                                                            | 73.8% ± 7.7%                         |
| Lateral xanthoma    | 32.5% ± 3.3% *                                                   | 0%                                   | 58.4% ± 15.2% *                                                  | 13.2% ± 6.2%                         | 61.1% ± 15.9%                                                    | 55.2% ± 12.1%                        | 44.8% ± 13.5%                                                    | 41.5% ± 9.4%                         |
| Hemorrhage          | 5% ± 0.8% *                                                      | 0%                                   | 30.7% ± 13.2%*                                                   | 7.5% ± 4.6%                          | 26.2% ± 17.5%                                                    | 15.6% ± 9.5%                         | 0%                                                               | 0%                                   |
| Medial thickening   | 87.5% ± 7.1%                                                     | 68.7% ± 8.7%                         | 94.3% ± 4.2%                                                     | 95% ± 3.7%                           | 100%                                                             | 96.1% ± 3.9%                         | 100%                                                             | 100%                                 |
| Chondrocytes        | 12.5% ± 2% *                                                     | 0%                                   | 31.8% ± 15.2%                                                    | 23.7% ± 9%                           | 93.5% ± 4.4% *                                                   | 57% ± 12.9%                          | 100% *                                                           | 78.7% ± 8.8%                         |
| Calcification       | 0%                                                               | 0%                                   | 7.5% ± 7.5%                                                      | 0%                                   | 37.3% ± 17.7%                                                    | 20.3% ± 11.2%                        | 38.4% ± 17.2%                                                    | 44.9% ± 10.5%                        |

C

|                            | Male                                                 |                                      |                                                      |                                     |                                                      |                                      |                                                       |                                      |
|----------------------------|------------------------------------------------------|--------------------------------------|------------------------------------------------------|-------------------------------------|------------------------------------------------------|--------------------------------------|-------------------------------------------------------|--------------------------------------|
|                            | 20 weeks of age                                      |                                      | 30 weeks of age                                      |                                     | 40 weeks of age                                      |                                      | 50 weeks of age                                       |                                      |
|                            | <i>ApoE</i> <sup>-/-</sup> / <i>Gclc-Tg</i><br>(n=9) | <i>ApoE</i> <sup>-/-</sup><br>(n=10) | <i>ApoE</i> <sup>-/-</sup> / <i>Gclc-Tg</i><br>(n=8) | <i>ApoE</i> <sup>-/-</sup><br>(n=6) | <i>ApoE</i> <sup>-/-</sup> / <i>Gclc-Tg</i><br>(n=6) | <i>ApoE</i> <sup>-/-</sup><br>(n=10) | <i>ApoE</i> <sup>-/-</sup> / <i>Gclc-Tg</i><br>(n=10) | <i>ApoE</i> <sup>-/-</sup><br>(n=11) |
| <b>Foam cells</b>          | 88% ± 5.2%                                           | 86.1% ± 7.5%                         | 81.8% ± 8.1%*                                        | 52.2% ± 19.3%                       | 66.7% ± 12.9%                                        | 63.8% ± 12.3%                        | 46.1% ± 11.8%*                                        | 35.1% ± 10.3%                        |
| <b>Thin fibrous cap</b>    | 1.6% ± 1.6%                                          | 0%                                   | 0%*                                                  | 23.9% ± 12.8%                       | 0%*                                                  | 15.4% ± 9.1%                         | 9.5% ± 7.7%                                           | 8.6% ± 5.2%                          |
| <b>Large necrotic core</b> | 2.2% ± 2.2%                                          | 0%                                   | 22.7% ± 10.9%                                        | 31.7% ± 15.2%                       | 34.4% ± 19.5%                                        | 31% ± 13.1%                          | 31.5% ± 12.1%*                                        | 48.8% ± 9.8%                         |
| <b>Cholesterol clefts</b>  | 2.2% ± 2.2%                                          | 0%                                   | 23.8% ± 7%                                           | 33.5% ± 16.7%                       | 67.8% ± 18.9%                                        | 76.8% ± 10%                          | 84.7% ± 6.1%*                                         | 96.4% ± 2.7%                         |
| <b>Lateral xanthomas</b>   | 3.2% ± 3.2%                                          | 0%                                   | 32.1% ± 10.9%                                        | 42.9% ± 16.4%                       | 67.8% ± 18.9%                                        | 54.9% ± 13.1%                        | 62% ± 10.5%                                           | 54.5% ± 9.8%                         |
| <b>Hemorrhage</b>          | 5.6% ± 5.6%                                          | 0%                                   | 24.6% ± 9.2%                                         | 27.8% ± 18.1%                       | 6.7% ± 5.2%                                          | 4% ± 4%                              | 6.1% ± 4.1%                                           | 10.6% ± 9%                           |
| <b>Medial thickening</b>   | 97.2% ± 2.8%                                         | 100%                                 | 96.4% ± 3.3%                                         | 100%                                | 100%                                                 | 100%                                 | 100%                                                  | 100%                                 |
| <b>Chondrocytes</b>        | 3.2% ± 3.2%                                          | 0%                                   | 31.33% ± 12.8%                                       | 41.1% ± 16.6%                       | 61.1% ± 24%                                          | 51.2% ± 13.8%                        | 89.2% ± 4%*                                           | 98.2% ± 1.8%                         |
| <b>Calcification</b>       | 0%                                                   | 0%                                   | 0%                                                   | 11.1% ± 11.1%                       | 27.8% ± 15.5%                                        | 28.2% ± 12.2%                        | 51.9% ± 11.9%*                                        | 71% ± 8.9%                           |

D

|                            | Female                                                |                                      |                                                       |                                      |                                                      |                                     |                                                      |                                      |
|----------------------------|-------------------------------------------------------|--------------------------------------|-------------------------------------------------------|--------------------------------------|------------------------------------------------------|-------------------------------------|------------------------------------------------------|--------------------------------------|
|                            | 20 weeks of age                                       |                                      | 30 weeks of age                                       |                                      | 40 weeks of age                                      |                                     | 50 weeks of age                                      |                                      |
|                            | <i>ApoE</i> <sup>-/-</sup> / <i>Gclc-Tg</i><br>(n=13) | <i>ApoE</i> <sup>-/-</sup><br>(n=11) | <i>ApoE</i> <sup>-/-</sup> / <i>Gclc-Tg</i><br>(n=13) | <i>ApoE</i> <sup>-/-</sup><br>(n=10) | <i>ApoE</i> <sup>-/-</sup> / <i>Gclc-Tg</i><br>(n=7) | <i>ApoE</i> <sup>-/-</sup><br>(n=7) | <i>ApoE</i> <sup>-/-</sup> / <i>Gclc-Tg</i><br>(n=7) | <i>ApoE</i> <sup>-/-</sup><br>(n=18) |
| <b>Foam cells</b>          | 82.5% ± 6%                                            | 77.6% ± 7.7%                         | 73.9% ± 10.7%                                         | 77.2% ± 9.7%                         | 40% ± 24.5%                                          | 58% ± 17.5%                         | 32.7% ± 16.3%                                        | 33.7% ± 9.5%                         |
| <b>Thin Fibrous cap</b>    | 0%                                                    | 5.6% ± 3%                            | 4.5% ± 3.1%*                                          | 34.1% ± 11.3%                        | 0%*                                                  | 14.3% ± 14.3%                       | 6.5% ± 3.9%*                                         | 11.9% ± 5.2%                         |
| <b>Large Necrotic core</b> | 7.9% ± 6.1%                                           | 0%                                   | 24.8% ± 6.3%                                          | 21.3% ± 9.5%                         | 39.7% ± 16.5%                                        | 28.6% ± 8.6%                        | 48.9% ± 17.9%*                                       | 60.9% ± 10.1%                        |
| <b>Cholesterol clefts</b>  | 6.7% ± 6.4%                                           | 0%                                   | 35.6% ± 11.2%                                         | 30.3% ± 10.6%                        | 88% ± 12%*                                           | 63.8% ± 10.9%                       | 97.2% ± 2.6%*                                        | 89.9% ± 6%                           |
| <b>Lateral xanthoma</b>    | 6.2% ± 6%                                             | 1.8% ± 1.8%                          | 29.5% ± 12.3%                                         | 32.8% ± 9.4%                         | 20% ± 20%*                                           | 75.2% ± 14.2%                       | 52.1% ± 19.9%                                        | 48% ± 10.8%                          |
| <b>Hemorrhage</b>          | 5% ± 3.5%                                             | 0%                                   | 14.9% ± 8.1%                                          | 9.6% ± 4.5%                          | 16% ± 16%                                            | 24.5% ± 14.2%                       | 22.2% ± 13.6%                                        | 0%                                   |
| <b>Medial thickening</b>   | 96.7% ± 3.2%                                          | 72% ± 9.6%                           | 100%                                                  | 100%                                 | 100%                                                 | 100%                                | 100%                                                 | 100%                                 |
| <b>Chondrocyte</b>         | 3.2% ± 3.2%                                           | 0%                                   | 31.8% ± 12.5%*                                        | 44.3% ± 11.7%                        | 66% ± 18.9%                                          | 72.4% ± 13.5%                       | 79% ± 8.9%*                                          | 88.1% ± 7.6%                         |
| <b>Calcification</b>       | 0%                                                    | 0%                                   | 6.5% ± 3.6%                                           | 8.6% ± 8.6%                          | 23.7% ± 11.3%                                        | 27.5% ± 14.7%                       | 43.7% ± 12.5%*                                       | 60.6% ± 8.1%                         |

### Supplemental Table I. Composition of the Lesions in the Innominate Arteries.

The frequency of features of plaque composition were measured in male (A,C) and female (B,D) mice at 20, 30, 40, and 50 weeks of age. Data are presented as the mean percentage of the total Movat's stained sections per lesion per mouse exhibiting the listed marker ± SE, p<0.05 vs littermate controls.

| <b>BONE MARROW TRANSPLANT</b> |                                            |                                |                                           |                               |
|-------------------------------|--------------------------------------------|--------------------------------|-------------------------------------------|-------------------------------|
|                               | 20 weeks post transplant                   |                                | 30 weeks post transplant                  |                               |
|                               | <i>Apo E-/-/Gclm-/-</i><br>donor<br>(n=16) | <i>ApoE-/-</i> donor<br>(n=15) | <i>Apo E-/-/Gclm-/-</i><br>donor<br>(n=8) | <i>ApoE-/-</i> donor<br>(n=8) |
| <b>Foam cells</b>             | 31.4% ± 8.9%                               | 51.8% ± 11.6%                  | 24.6% ± 9%                                | 36.1% ± 14.5%                 |
| <b>Thin fibrous cap</b>       | 39.3% ± 9.3% *                             | 11.4% ± 5.7%                   | 23.7% ± 10%                               | 14.3% ± 8.6%                  |
| <b>Large necrotic core</b>    | 40% ± 9.6%                                 | 26.8% ± 7.9%                   | 54.4% ± 11.6%                             | 56.4% ± 13.9%                 |
| <b>Cholesterol clefts</b>     | 63.6% ± 10.4%                              | 43.4% ± 9%                     | 93% ± 3.7% *                              | 61.4% ± 10.6%                 |
| <b>Lateral xanthoma</b>       | 53.9% ± 12%                                | 38.2% ± 10.7%                  | 90.5% ± 5.4% *                            | 59.4% ± 13.3%                 |
| <b>Hemorrhage</b>             | 4.4% ± 3.6%                                | 2.7% ± 2.7%                    | 20% ± 8.2%                                | 10.1% ± 8.3%                  |
| <b>Medial thickening</b>      | 100%                                       | 100%                           | 100%                                      | 100%                          |
| <b>Chondrocytes</b>           | 64.1% ± 10.6% *                            | 32.7% ± 11.1%                  | 68.5% ± 12.1%                             | 68.3% ± 13.1%                 |
| <b>Calcification</b>          | 29.1% ± 10%                                | 16.1% ± 8.2%                   | 33.7% ± 12.5% *                           | 16.7% ± 12.2%                 |

|                            | <i>ApoE-/-/Gclc--Tg</i><br>donor<br>(n=16) | <i>ApoE-/-</i> donor<br>(n=15) | <i>ApoE-/-/Gclc-Tg</i><br>donor<br>(n=12) | <i>ApoE-/-</i> donor<br>(n=8) |
|----------------------------|--------------------------------------------|--------------------------------|-------------------------------------------|-------------------------------|
| <b>Foam cells</b>          | 85% ± 7.2% *                               | 51.8% ± 11.6%                  | 56.7% ± 12.7%*                            | 36.1% ± 14.5%                 |
| <b>Thin fibrous cap</b>    | 14.7% ± 5.3%                               | 11.4% ± 5.7%                   | 15.7% ± 9.2%                              | 14.3% ± 8.6%                  |
| <b>Large necrotic core</b> | 27.7% ± 7.5%                               | 26.8% ± 7.9%                   | 45.1% ± 10%*                              | 56.4% ± 13.9%                 |
| <b>Cholesterol clefts</b>  | 39.2% ± 8.6%                               | 43.4% ± 9%                     | 59.4% ± 9.6%                              | 61.4% ± 10.6%                 |
| <b>Lateral xanthomas</b>   | 15.3% ± 7.4%                               | 38.2% ± 10.7%                  | 75.1% ± 10.4%                             | 59.4% ± 13.3%                 |
| <b>Hemorrhage</b>          | 0%                                         | 2.7% ± 2.7%                    | 11.6% ± 5.7%                              | 10.1% ± 8.3%                  |
| <b>Medial thickening</b>   | 100%                                       | 100%                           | 100%                                      | 100%                          |
| <b>Chondrocytes</b>        | 19.3% ± 8.7% *                             | 32.7% ± 11.1%                  | 50.7% ± 12%*                              | 68.3% ± 13.1%                 |
| <b>Calcification</b>       | 0% *                                       | 16.1% ± 8.2%                   | 17.4% ± 6.6%                              | 16.7% ± 12.2%                 |

**Supplemental Table II. Composition of the Lesions in the Innominate Arteries Following Bone Marrow Transplantation.**

The frequency of features of plaque composition were measured in female *apoE-/-* recipient mice at 20 and 30 weeks post-transplant. Data are presented as the mean percentage of the total Movat's stained sections per lesion per mouse exhibiting the listed marker ± SE, p<0.05 vs littermate controls.

## Supplemental Figure Legends

### Supplemental Figure I. Western Blot of GCLC Protein in Peritoneal Macrophages from *apoE*<sup>-/-</sup>/*Gclt*-*Tg* and *apo E*<sup>-/-</sup> Littermate Control Mice.

Western Blot. Line 1: molecular weight markers. Lines 2 and 3: extracts of thioglycollate elicited peritoneal macrophages from 2 *apoE*<sup>-/-</sup>/*Gclt*-*Tg* mice. Line 4: extract of peritoneal macrophages from *apoE*<sup>-/-</sup> littermate control mouse.

### Supplemental Figure II. Smooth Muscle Cell Content of the Lesions in the Innominate Arteries.

Area of smooth muscle actin staining as a percentage of the total area of the lesions in both male (A, B) and female (C, D) mice. Data are presented as means  $\pm$  SE.

### Supplemental Figure III. Macrophage and Smooth Muscle Immunostaining in the Innominate Arteries.

***ApoE*<sup>-/-</sup>/*Gclm*<sup>-/-</sup> and *Apo E*<sup>-/-</sup> Littermate Controls (A-H).** Representative examples of immunoperoxidase staining for smooth muscle actin and the macrophage-specific marker Mac2 in the innominate arteries of 40 week old mice.

Smooth muscle actin: *apoE*<sup>-/-</sup>/*Gclm*<sup>-/-</sup> male (A), *apoE*<sup>-/-</sup>/*Gclm*<sup>-/-</sup> female (B) *apoE*<sup>-/-</sup>/*Gclm*<sup>+/+</sup> male (C), *apoE*<sup>-/-</sup>/*Gclm*<sup>+/+</sup> female (D).

Mac2: *apoE*<sup>-/-</sup>/*Gclm*<sup>-/-</sup> male (E), *apoE*<sup>-/-</sup>/*Gclm*<sup>-/-</sup> female (F), *apoE*<sup>-/-</sup>/*Gclm*<sup>+/+</sup> male (G), *apoE*<sup>-/-</sup>/*Gclm*<sup>+/+</sup> female (H).

***ApoE*<sup>-/-</sup>/*Gclc*-*Tg* mice and *Apo E*<sup>-/-</sup> Littermate Controls (I-P).** Representative examples of immunoperoxidase staining for smooth muscle actin and the macrophage-specific marker Mac2 in the innominate arteries of 30-week-old mice.

Smooth muscle actin; *apoE*<sup>-/-</sup>/*Gclc*-*Tg* male (I), *apoE*<sup>-/-</sup>/*Gclc*-*Tg* female (J), *apoE*<sup>-/-</sup>/*Gclc*-*WT* male (K), *apoE*<sup>-/-</sup>/*Gclc*-*WT* female (L).

Mac2; *apoE*<sup>-/-</sup>/*Gclc*-*Tg* male (M), *apoE*<sup>-/-</sup>/*Gclc*-*Tg* female (N), *apoE*<sup>-/-</sup>/*Gclc*-*WT* male (O), *apoE*<sup>-/-</sup>/*Gclc*-*WT* female (P).

**Supplemental Figure IV. Plasma Lipoprotein Cholesterol Profiles for *ApoE*<sup>-/-</sup>/*Gclm*<sup>-/-</sup>, *ApoE*<sup>-/-</sup>/*Gclc*-*Tg*, and Littermate Control *Apo E*<sup>-/-</sup> Mice.**

Lipoprotein cholesterol was measured in each fraction following FPLC separation of the plasma in 3 mice from each group at 20 and 50 weeks of age (A,B males; C,D females).

**Supplemental Figure V. Plasma Lipoprotein Cholesterol Profiles for *Apo E*<sup>-/-</sup> Mice Transplanted with Bone Marrow from *ApoE*<sup>-/-</sup>/*Gclm*<sup>-/-</sup> or *Apo E*<sup>-/-</sup> Littermate Control Mice.**

Lipoprotein cholesterol was measured in each fraction following FPLC separation of the plasma pooled from 7 *apo E*<sup>-/-</sup> mice transplanted with bone marrow from *apoE*<sup>-/-</sup>/*Gclm*<sup>-/-</sup> mice and 14 *apo E*<sup>-/-</sup> mice transplanted with bone marrow from littermate *apo E*<sup>-/-</sup> control mice. The plasma was obtained from mice sacrificed 20 weeks following bone marrow transplant.

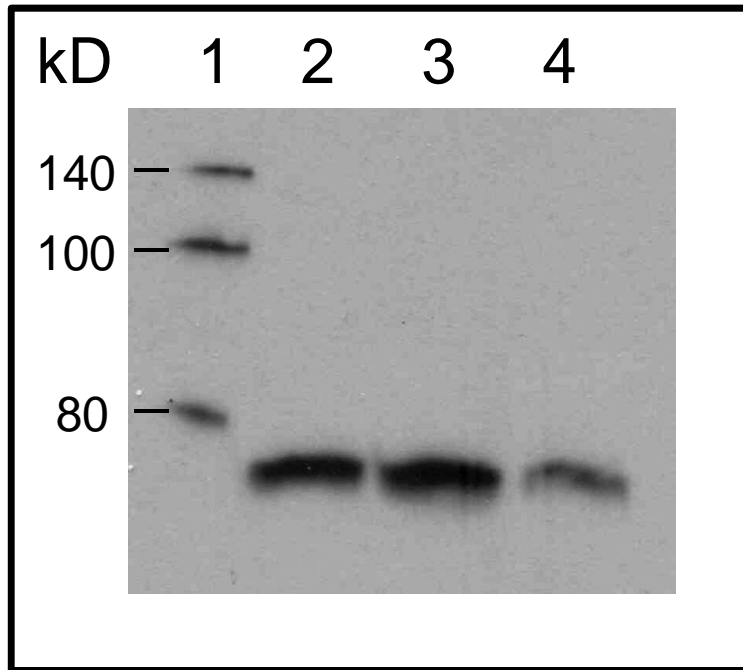

**Supplemental Figure I**



# LESION SMOOTH MUSCLE ACTIN CONTENT

*ApoE*<sup>-/-</sup> *Gclm*<sup>-/-</sup>

*ApoE*<sup>-/-</sup> *Gclc-Tg*

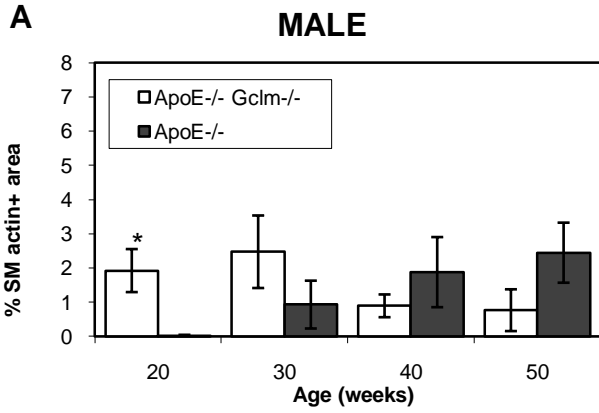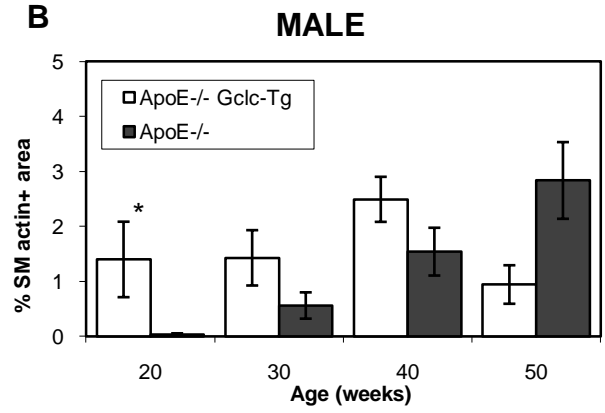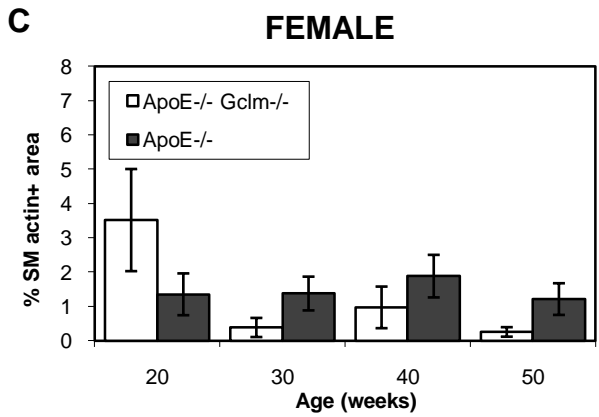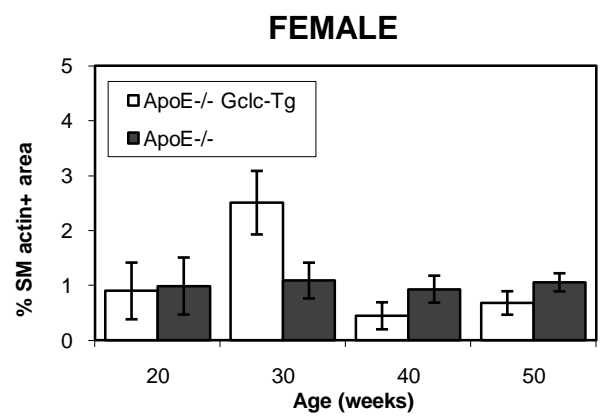

Supplemental Figure II.

## IMMUNOHISTOCHEMICAL ANALYSIS

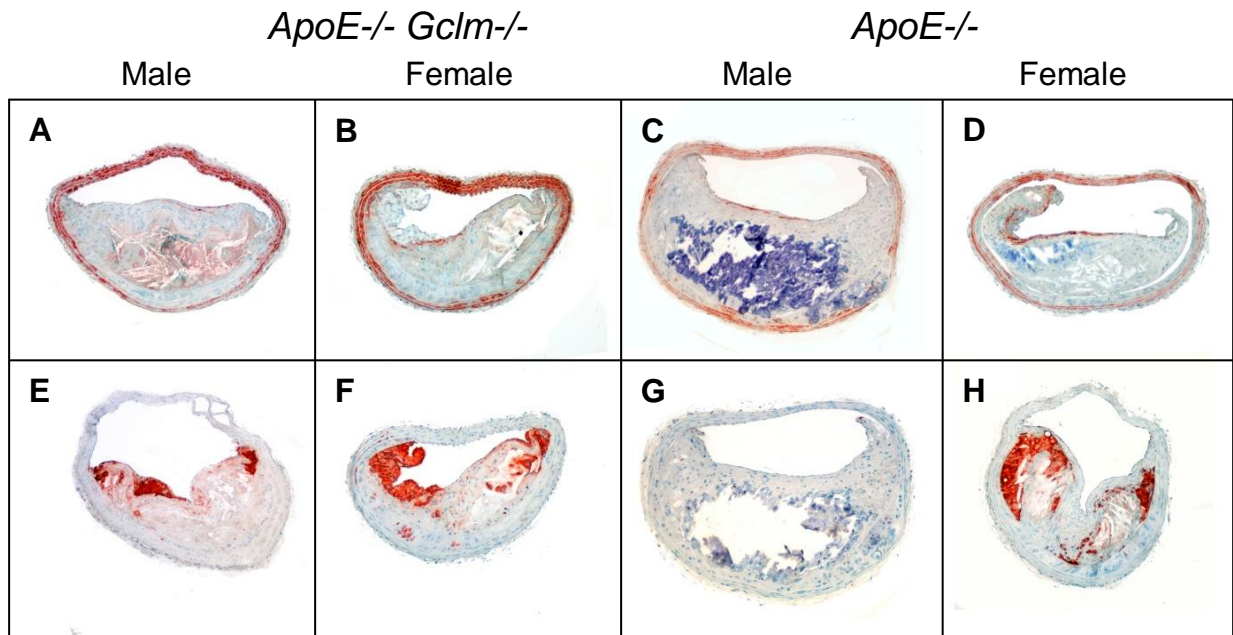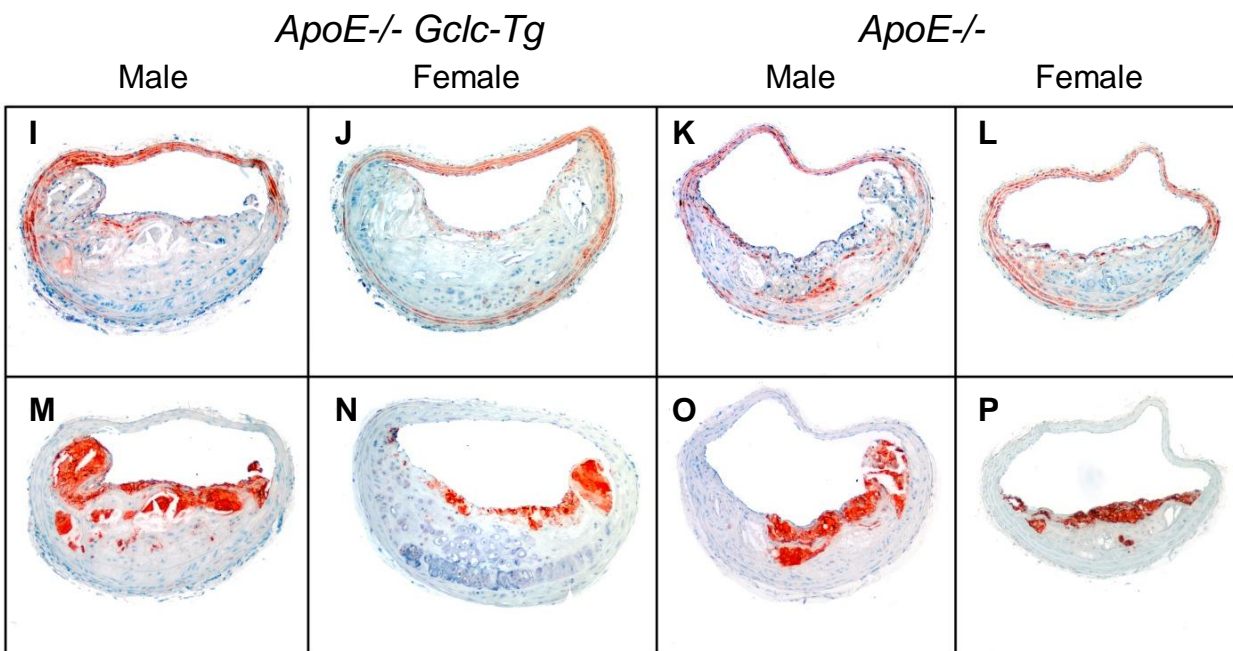

Supplemental Figure III.

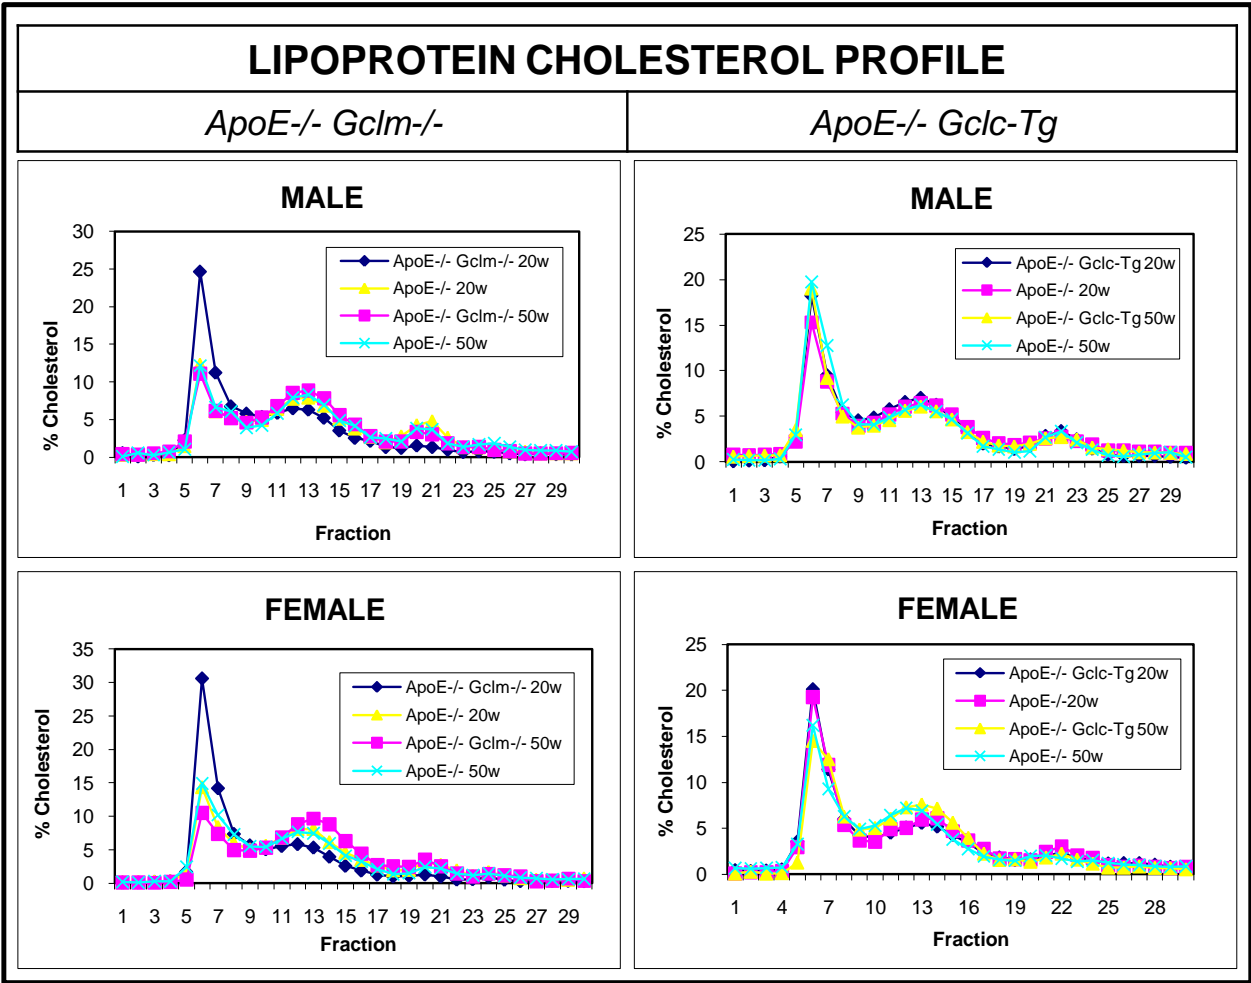

Supplemental Figure IV.

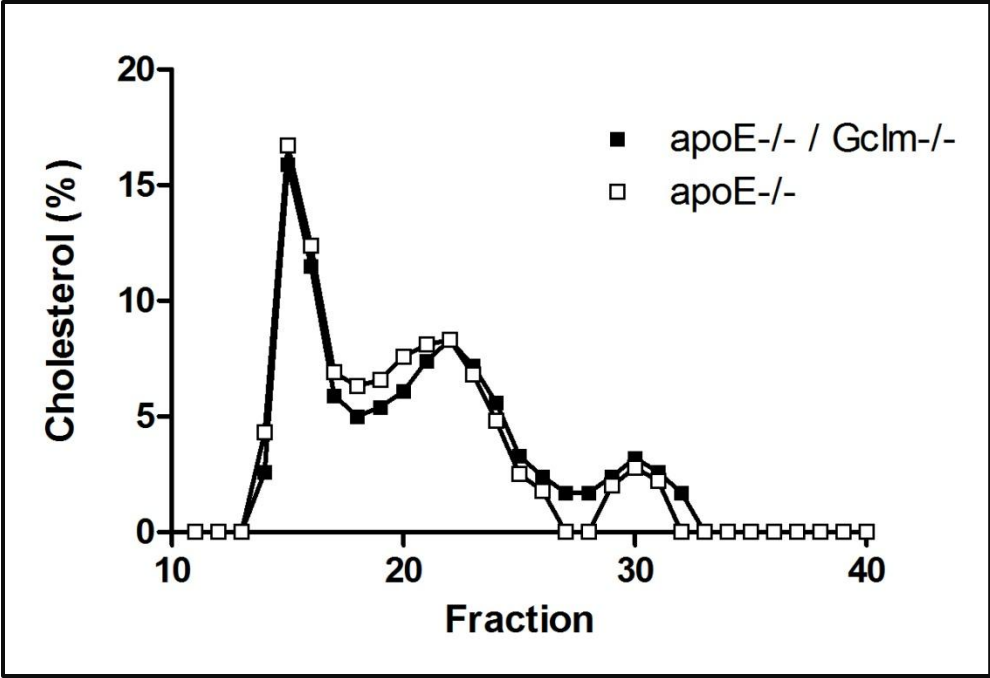

Supplemental Figure V.
